# Supplementary material
Source: Springer Nature journal article supplement (https://www.springermedizin.de/resource/supplementary/12885_2010_2669_MOESM8_ESM.pdf/9461696)

A

 $p = 0.001$ **JAM**

● MAP2K4 siRNA

▲ Non-targeting siRNA

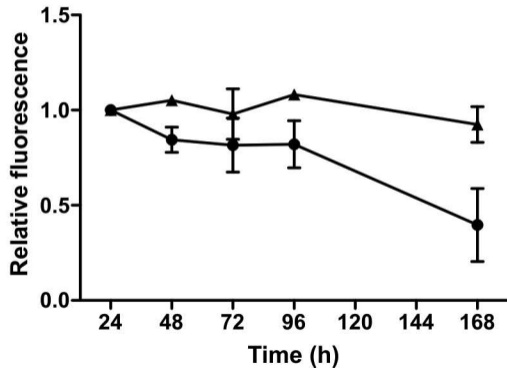**HOSE6.3** $p = 0.12$ 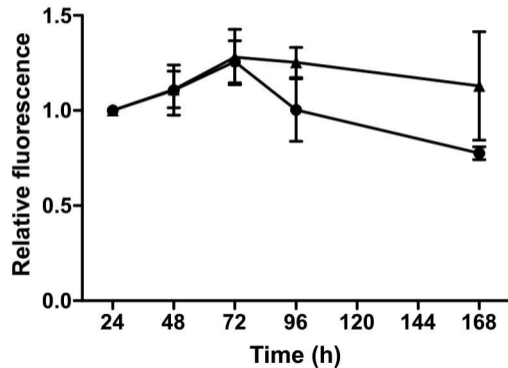

Supplement: MOESM8 [file 9461696]
